# Supplementary material for: Shape-controlled synthesis of single-crystalline anatase TiO2 micro/nanoarchitectures for efficient dye-sensitized solar cells
Source: Royal Society of Chemistry journal article supplement (doi:10.1039/c6se00041j), 2017-01-01
Supplement: c6se00041j1.pdf [file c6se00041j1.pdf]

---

## Supporting Information

### Shape-controlled Synthesis of Single-crystalline Anatase TiO<sub>2</sub> Micro/nanoarchitectures for Efficient Dye-sensitized Solar Cells

Yong Ding<sup>1,2,§</sup>, Tingting Zhang<sup>3,4,§</sup>, Cheng Liu<sup>1</sup>, Yi Yang<sup>1</sup>, Jiahong Pan<sup>1</sup>, Jianxi Yao<sup>1</sup>, Linhua Hu<sup>2,\*</sup> and Songyuan Dai<sup>1,2,\*</sup>

<sup>1</sup>Beijing Key Laboratory of Novel Thin-Film Solar Cells, North China Electric Power University, Beijing, 102206, P. R. China.

<sup>2</sup>Key Laboratory of Novel Thin Film Solar Cells, Institute of Applied Technology, Hefei Institutes of Physical Science, Chinese Academy of Sciences, Hefei 230031, P. R. China.

<sup>3</sup>Beijing National Laboratory for Condensed Matter Physics and Institute of Physics, Chinese Academy of Sciences, Beijing 100190, China.

<sup>4</sup>School of Physics, Beijing Institute of Technology, Beijing 100081, China.

\*Email: [solarhu@sina.com](mailto:solarhu@sina.com) and [sydai@ipp.cas.cn](mailto:sydai@ipp.cas.cn).

§These authors contributed equally to this work.

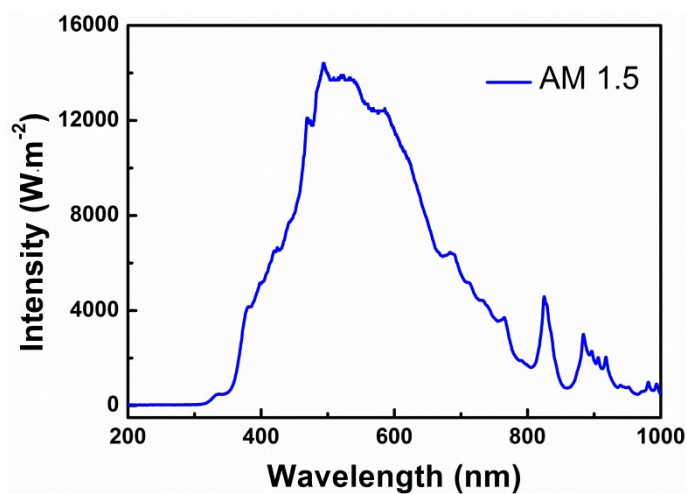

Fig. S1 The lamp spectra of one sun AM 1.5 G illumination (100 mW·cm<sup>-2</sup>) as a function of wavelength.

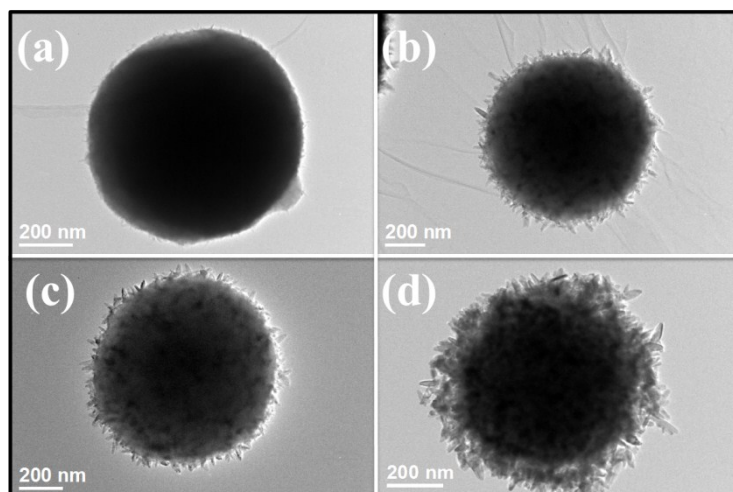

Fig. S2 Typical TEM images of the SM obtained in (a) 4 h, (b) 8 h, (c) 12 h, and 24 h.

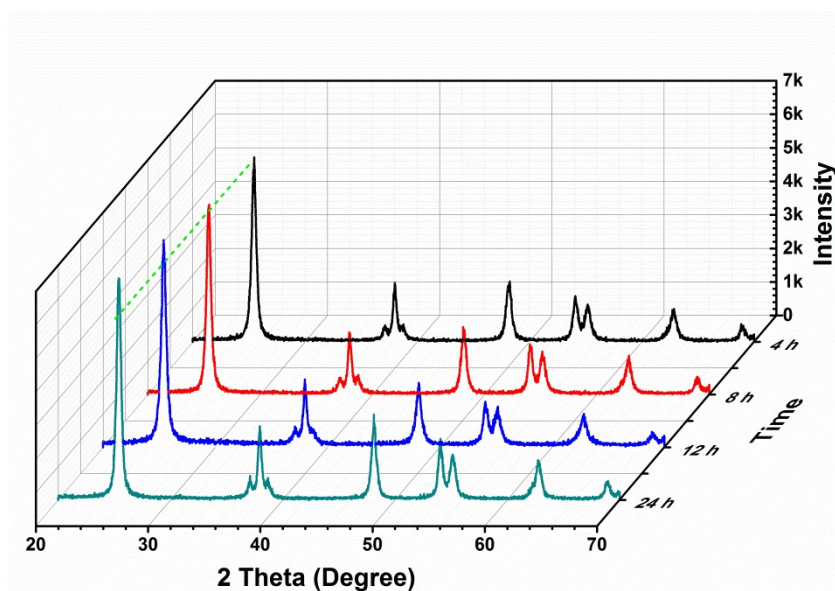

Fig. S3 XRD patterns of the SM synthesized with different reaction time.

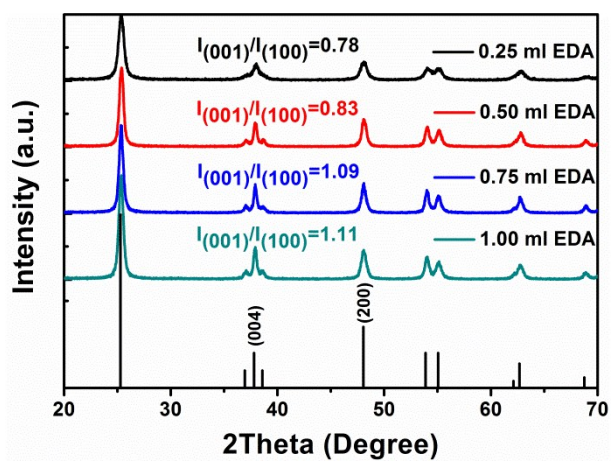

Fig. S4 XRD patterns of the SM using different amounts of EDA.

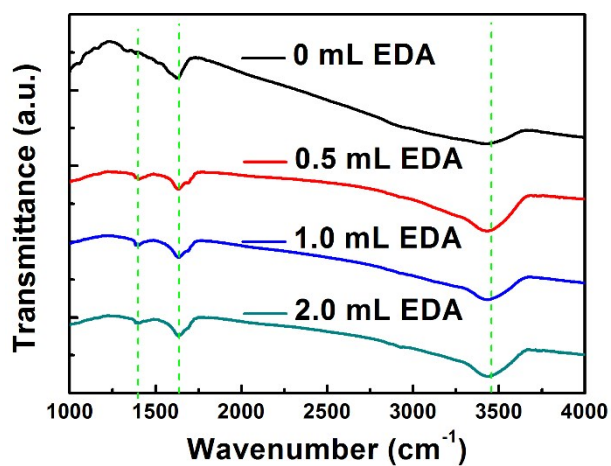

Fig. S5 FTIR spectra of TiO<sub>2</sub> micro/nanoarchitectures synthesized with different amounts of EDA.

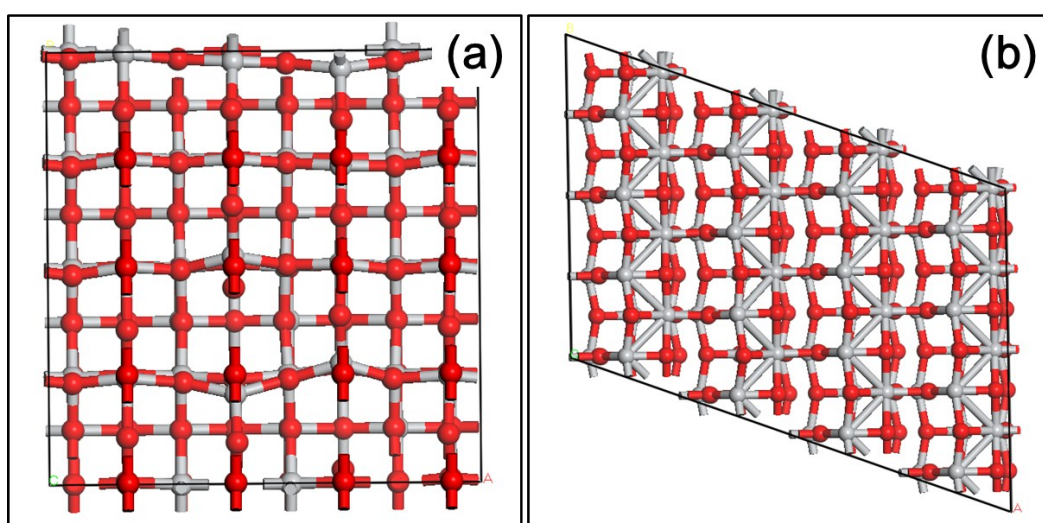

Fig. S6 Slice representation of the two surfaces of anatase: a (001) and b (101). Gray and red spheres represent titanium and oxygen ions, respectively.

Table S1 Molecular adsorption energies of EDA on the (101) and (001) faces.

| Facet | $E_{\text{EDA-facet}}$ (eV) | $E_{\text{EDA}}$ (eV) | $E_{\text{facet}}$ (eV) |
|-------|-----------------------------|-----------------------|-------------------------|
| (101) | -1998.83                    | -63.61                | -2064.43                |
| (001) | -1736.70                    | -63.61                | -1668.71                |

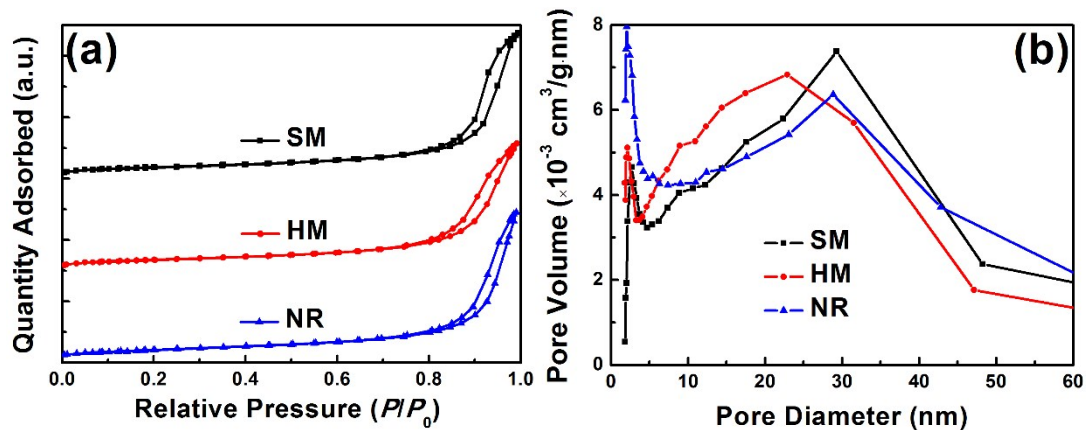

Fig. S7 (a) Nitrogen sorption isotherms and (b) the corresponding pore diameter distributions of the SM, HM, and NR.

Table S2 Physical properties of the SM, HM, and NR.

| Samples | Pore size <sup>a</sup> (nm) | Porosity <sup>b</sup> (P) | $S_{\text{BET}}$ ( $\text{m}^2 \cdot \text{g}^{-1}$ ) | Crystallite <sup>c</sup> (nm) |
|---------|-----------------------------|---------------------------|-------------------------------------------------------|-------------------------------|
| SM      | 21.3                        | 0.566                     | 74.8                                                  | 29.3                          |
| HM      | 18.4                        | 0.588                     | 82.5                                                  | 28.1                          |
| NR      | 16.6                        | 0.541                     | 70.5                                                  | 31.8                          |

<sup>a</sup>Pore sizes are based on the adsorption average pore width ( $4V/A$  by BET) calculated from the BJH model.

<sup>b</sup>Porosity is calculated from the BJH pore volume according to 
$$P = \frac{\rho V_p}{1 + \rho V_p}$$

<sup>c</sup>Crystallite is calculated by the Scherrer equation.

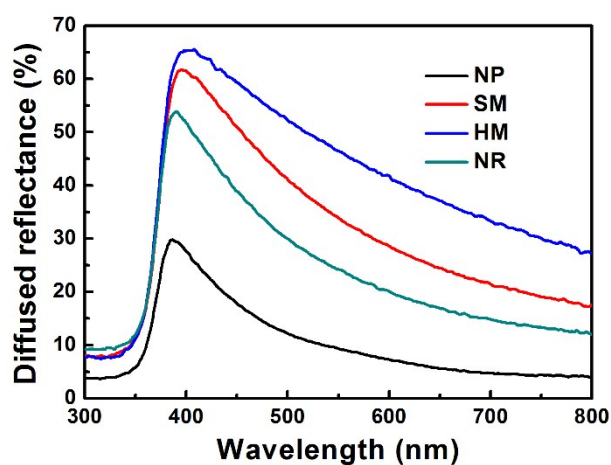

Fig. S8 Diffuse reflectance spectra of the NP, SM, HM, and NR photoanodes with the same film thickness ( $\sim 9.5 \mu\text{m}$ ).
